# Supplementary material for: PBMCs gene expression predicts liver fibrosis regression after successful HCV therapy in HIV/HCV-coinfected patients
Source: PubMed Central journal article supplement (PMC11794839; doi:10.3389/fphar.2024.1436198), 2025-01-22

**Supplementary Figure 1.** Visualization of xCell scores for each of the major PBMC cell types estimated by the xCell algorithm in baseline samples.

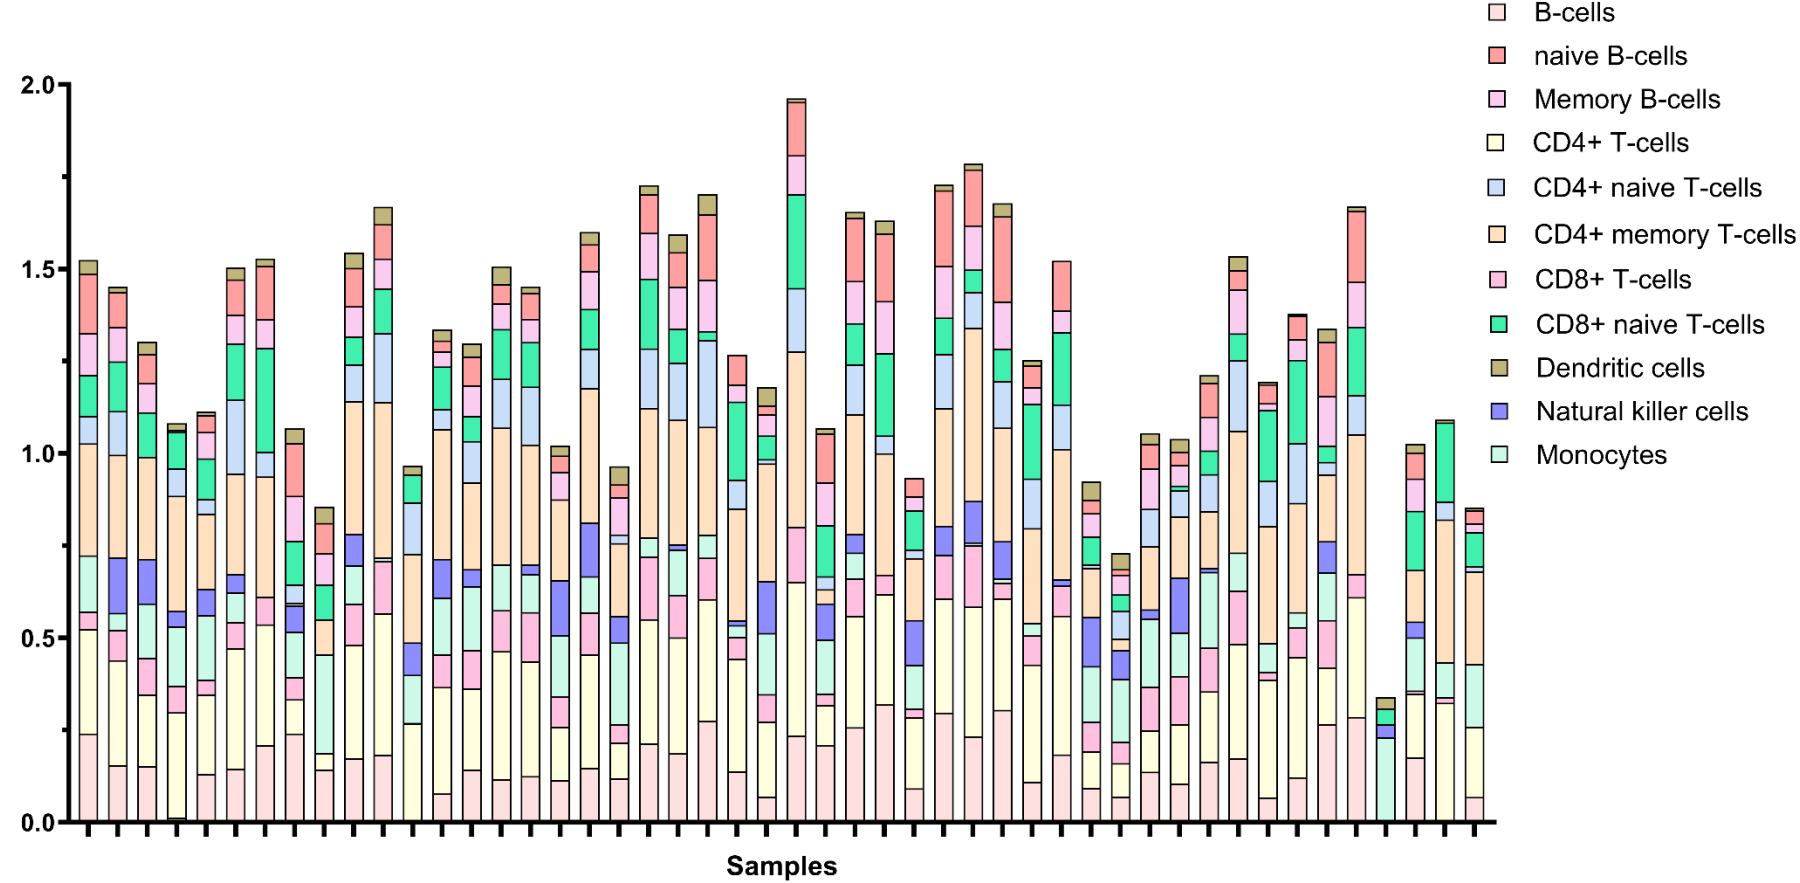

Supplement: Image1.pdf [file Image1.pdf]
